# Supplementary material
Source: Springer Nature journal article supplement (https://www.springermedizin.de/resource/supplementary/12913_2011_2002_MOESM1_ESM.PDF/9530614)
Supplement: MOESM1 [file 9530614]

**BIOGRAPHICAL**

Please answer the following questions about your background.

1. How do you best describe your agency/organization?
  - State Health Department
  - City or County Health Department
  - Coalition
  - Advocacy Group
  - University
  - Community-Based Organization
  - Voluntary Health Organization
  - Other (please specify)
  
2. Though you may work in several capacities, which do you consider your primary position? **(Required)**
  - Program Manager/Administrator/Coordinator
  - Health Educator
  - Epidemiologist
  - Statistician
  - Program Planner
  - Program Evaluator
  - Division or Bureau Head/Division Deputy Director
  - Department Head
  - Community Health Nurse, Social Worker, Dietitian, Nutritionist
  - Lay Health Worker
  - Other (please specify)
  
3. How long have you worked for this agency/organization?  
  
\_\_\_ Years  
\_\_\_ Months
  
4. How long have you been in your current position?  
  
\_\_\_ Years  
\_\_\_ Months
  
5. How long have you been involved in public health overall?  
  
\_\_\_ Years  
\_\_\_ Months

6. Do you specialize in a single program area or do you manage multiple areas? **(Required)**
- I specialize in a single program area
  - I manage multiple program areas
7. In what single program area do you specialize? **(Required)**
- Diabetes
  - Obesity
  - Physical Activity
  - Diet/Nutrition
  - Cancer Prevention and Control
  - Tobacco
  - Cardiovascular Health
  - Arthritis
  - Asthma
  - School Health
  - Women's Health, including Maternal and Child Health
  - Vision Preservation
  - Healthy Aging
  - Osteoporosis
  - Other (please specify)
8. In what other program areas do you specialize? (Check all that apply) **(Required)**
- Diabetes
  - Obesity
  - Physical Activity
  - Diet/Nutrition
  - Cancer Prevention and Control
  - Tobacco
  - Cardiovascular Health
  - Arthritis
  - Asthma
  - School Health
  - Women's Health, including Maternal and Child Health
  - Vision Preservation
  - Healthy Aging
  - Osteoporosis
  - Other (please specify)

9. Please indicate the size of the population your agency serves.
- 0 – 24,999
  - 25,000 – 49,999
  - 50,000 – 74,999
  - 75,000 – 99,999
  - 100,000 – 149,999
  - 150,000 – 199,999
  - 200,000 – 299,999
  - 300,000 – 399,999
  - 400,000+
10. Please indicate your gender.
- Male
  - Female
11. What is the most advanced degree you have completed?
- High school or GED equivalent
  - Some college
  - Bachelor's degree
  - BSN/RN/LPN
  - MPH or MSPH
  - MS, MA, or other masters degree
  - DrPH
  - PhD
  - MD
  - Other (please specify)

## **EVIDENCE-BASED DECISION MAKING**

The next set of questions asks about evidence-based decision making. For the purposes of this survey, we think that evidence-based decision making involves the development, implementation, and evaluation of effective programs and policies in public health through:

- The systematic use of data and information systems
- The application of principles of scientific reasoning coupled with community engagement
- The appropriate use of behavioral science theory and program planning models

12. Based on your experience and best judgment, what percentage of programs in your agency is evidence-based?

\_\_\_\_\_













31. Distance training opportunities via conference call or CD-ROM.

**Least likely  
to use**

**0    1    2    3    4    5    6    7    8    9    10**  
                             

**Most likely  
to use**

32. A peer-to-peer network where you could discuss issues and ideas with colleagues.

**Least likely  
to use**

**0    1    2    3    4    5    6    7    8    9    10**  
                             

**Most likely  
to use**

33. Are there other resources that you would find helpful in using evidence-based decision making? What are they?
